# Supplementary material for: A Zn-coordination polymer as a multifunctional fluorescent probe for the detection of V2O74−, Fe3+, and p-nitrotoluene
Source: Royal Society of Chemistry journal article supplement (doi:10.1039/d2cp05921e), 2023-01-01
Supplement: d2cp05921e1.pdf [file d2cp05921e1.pdf]

## ***Electronic Supplementary Information (ESI)***

**A stable Zn-MOF multifunctional fluorescent probe was used for  
the specific detection of Fe<sup>3+</sup>, V<sub>2</sub>O<sub>7</sub><sup>4-</sup>, *p*-nitrotoluene**

**Shengsheng Qi, Zhang Li, Yuejiao Jia, Dechao Li and Ming Hu \***

School of Chemistry and Chemical Engineering, Inner Mongolia University, Hohhot 010021, China; Inner Mongolia Key Laboratory of Chemistry and Physics of Rare Earth Materials.

\*Corresponding authors. E-mail: hm988@126.com. Tel: +86-471-4992981.

### **Materials and general methods**

All chemicals were commercially obtained that without further purification. Zn(NO<sub>3</sub>)<sub>2</sub>·6H<sub>2</sub>O, H<sub>2</sub>bpdc and Htpba were purchased by Jinan Henghua Sci. & Tec. Co., Ltd. Powder X-ray diffraction was carried out on a Bruker SMART APEX II CCD X-ray single crystal diffractometer. Thermogravimetric analysis (TGA) was performed by a Trisch STA409pc analyzer under a nitrogen atmosphere. Luminescence spectra were recorded on an FLS 920 fluorescence analyzer. Infrared spectra were recorded on VERTEX70. The UV-VIS spectrum was recorded by a UV-vis spectrophotometer.

### **X-Ray crystallography**

Crystallographic data for **1** was collected on a Bruker Smart 1000 diffractometer equipped with graphite-monochromatic Cu K $\alpha$  radiation ( $\lambda = 0.71073 \text{ \AA}$ ) using the  $\omega$ -scan technique at room temperature. Semiempirical absorption corrections were applied using the SADABS

program. The structure was solved by direct methods using SHELXS-2018 and was refined by full matrix leastsquares on  $|F|^2$  using the SHELXTL-2018 program. All non-hydrogen atoms were refined anisotropically. The organic hydrogen atoms were geometrically generated, the hydrogen atoms of water molecules were located from difference Fourier maps and were refined with the common isotropic thermal parameter. Details of the crystal parameter data collection and refinement for **1** are summarized in Supplementary Table S1.

### Luminescence sensing experiments

Fully ground 1.65 mg of **1** was added to 2.7 mL deionized water and sonicated for 30 min to make it fully dispersed. Then 300  $\mu$ L of different analytes with a concentration of  $1.0 \times 10^{-3}$  M were added to the suspension for fluorescence test.

**Table S1** The crystal data for **1**.

|                                     |                                                                  |
|-------------------------------------|------------------------------------------------------------------|
| Compound                            | <b>1</b>                                                         |
| Formula                             | C <sub>32</sub> H <sub>19</sub> N <sub>4</sub> O <sub>4</sub> Zn |
| Formula Weight                      | 588.88                                                           |
| <i>T</i> /K                         | 273.15                                                           |
| Crystal System                      | triclinic                                                        |
| Space Group                         | <i>P</i> $\bar{1}$                                               |
| <i>a</i> (Å)                        | 10.4776(4)                                                       |
| <i>b</i> (Å)                        | 11.3099(4)                                                       |
| <i>c</i> (Å)                        | 11.4836(4)                                                       |
| $\alpha$ (°)                        | 75.2050(10)                                                      |
| $\beta$ (°)                         | 73.4410(10)                                                      |
| $\gamma$ (°)                        | 73.7360(10)                                                      |
| <i>V</i> (Å <sup>3</sup> )          | 1229.18(8)                                                       |
| <i>Z</i>                            | 2                                                                |
| <i>D</i> calc.(g cm <sup>-3</sup> ) | 1.591                                                            |

|                                                                                                                                                      |              |
|------------------------------------------------------------------------------------------------------------------------------------------------------|--------------|
| $\mu$ (mm <sup>-1</sup> )                                                                                                                            | 1.049        |
| $F$ (000)                                                                                                                                            | 602          |
| $R_{int}$                                                                                                                                            | 0.0199       |
| GOOF                                                                                                                                                 | 1.037        |
| $R_1^a$                                                                                                                                              | 0.0280       |
| $\omega R_2^b$ [ $I > 2\sigma(I)$ ]                                                                                                                  | 0.0707       |
| $R_1$ (all data)                                                                                                                                     | 0.0336       |
| $\omega R_2$ (all data)                                                                                                                              | 0.0734       |
| Largest difference in peak and hole (e Å <sup>-3</sup> )                                                                                             | 0.287 -0.237 |
| <sup>a</sup> $R_1 = \sum   F_o  -  F_c   / \sum  F_o $ . <sup>b</sup> $\omega R_2 = [\sum [\omega(F_o^2 - F_c^2)^2] / \sum \omega(F_o^2)^2]^{1/2}$ . |              |

**Table S2** The performances of different CPs sensors with detecting Fe<sup>3+</sup> ion.

| Fluorescent probes                                                                         | Detection limit           | Ref |
|--------------------------------------------------------------------------------------------|---------------------------|-----|
| {[Cd <sub>3</sub> (itp) <sub>2</sub> (btc) <sub>2</sub> ]·4H <sub>2</sub> O} <sub>n</sub>  | 0.12 μM                   | (1) |
| metallo-supramolecular polypseudorotaxane                                                  | 0.893 nM                  | (2) |
| ZSTU-1                                                                                     | 63.8 nM                   | (3) |
| TbL <sub>0.5</sub> (H <sub>2</sub> L) <sub>0.5</sub> (H <sub>2</sub> O) DMF                | 0.7 μM                    | (4) |
| CP 1                                                                                       | 1.72 μmol/L               | (5) |
| {[Zn <sub>3</sub> (mtrb) <sub>3</sub> (btc) <sub>2</sub> ]·3H <sub>2</sub> O} <sub>n</sub> | 1.78 μM                   | (6) |
| TPA-Bp                                                                                     | 1.02 × 10 <sup>-5</sup> M | (7) |
| Sr <sub>2</sub> (tcbpe)                                                                    | 0.14 mM                   | (8) |
| This work                                                                                  | 9.33 nM                   |     |

**Table S3** The performances of different CPs sensors with detecting *p*-nitrotoluene.

| Fluorescent probes                                                                             | Detection limit         | Ref  |
|------------------------------------------------------------------------------------------------|-------------------------|------|
| [Cd <sub>4</sub> (bptc) <sub>2</sub> (DMA) <sub>4</sub> (H <sub>2</sub> O) <sub>2</sub> ·4DMA] | 0.37 ppm                | (9)  |
| CP 4                                                                                           | 0.88 ppm                | (10) |
| 1A and 2A                                                                                      | 0.062 μM                | (11) |
| CCH                                                                                            | 25 × 10 <sup>-9</sup> M | (12) |
| GCE/a-MnO <sub>2</sub>                                                                         | 144 nM                  | (13) |
| AI Egens                                                                                       | 39ppb                   | (14) |
| This work                                                                                      | 50.9 nM                 |      |

**Table S4** HOMO and LUMO energies calculated for nitroaromatic explosives at B3LYP/6-31G\*\* level of theory.

| Analytes                     | HOMO (eV) | LUMO (eV) | Band gap (eV) |
|------------------------------|-----------|-----------|---------------|
| Htpba                        | -6.4028   | -1.9524   | 4.4504        |
| H <sub>2</sub> bqdc          | -6.5957   | -2.6253   | 3.9704        |
| NB <sup>[15]</sup>           | -7.5912   | -2.4283   | 5.1629        |
| TNT <sup>[15]</sup>          | -8.4592   | -3.4926   | 4.9666        |
| 1,3-DNB <sup>[15]</sup>      | -7.9855   | -3.4311   | 4.5544        |
| 1,3,5-TNB <sup>[16]</sup>    | -8.9338   | -3.6831   | 5.2507        |
| 2,4-DNT <sup>[15]</sup>      | -7.7645   | -3.2174   | 4.5471        |
| <i>m</i> -NT <sup>[16]</sup> | -7.2725   | -2.3619   | 4.9106        |
| <i>o</i> -NT <sup>[17]</sup> | -7.3511   | -2.3015   | 5.0496        |
| 2,4-DNP <sup>[18]</sup>      | -8.00572  | -3.77103  | 4.23469       |
| 1,4-DNB <sup>[16]</sup>      | -8.3525   | -3.4967   | 4.8557        |
| <i>p</i> -NT <sup>[19]</sup> | -7.362160 | -2.320531 | 5.041628      |

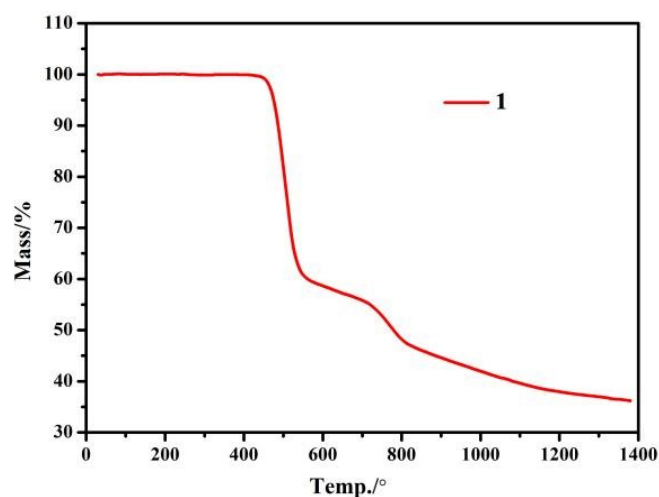

**Fig.S1** TG analysis plots of complex 1.

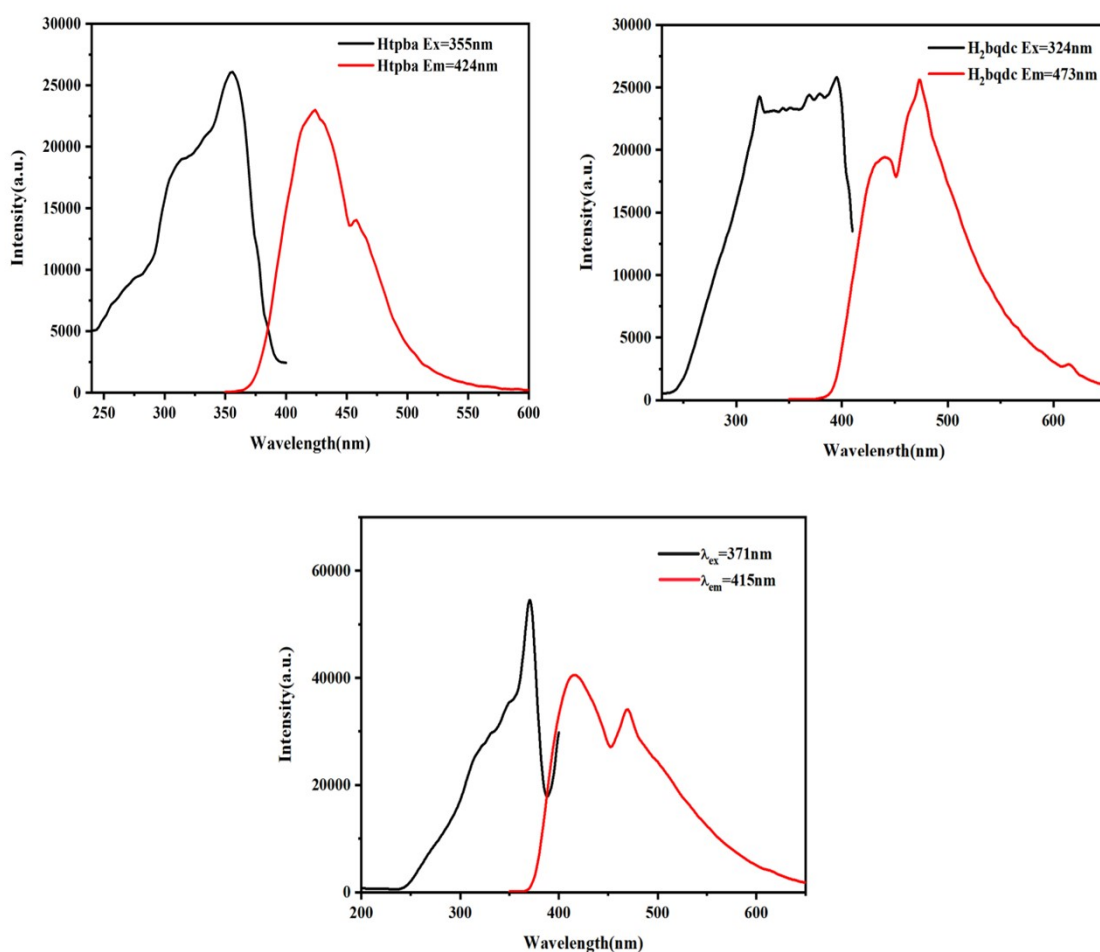

**Fig.S2** Excitation and emission spectra of (a)  $H_2bqdc$  ligand; (b) ligand  $Htpba$  and (c) complex **1** at the room temperature.

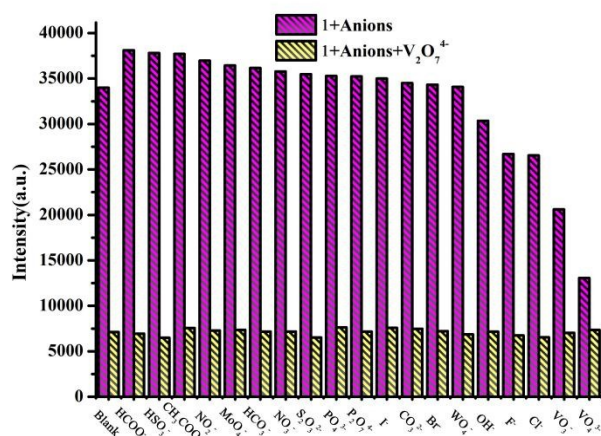

**Fig.S3** Comparison of fluorescence intensity of complex **1** in aqueous solution with different interfering cations and in aqueous solution with equal amount of  $V_2O_7^{4-}$ .

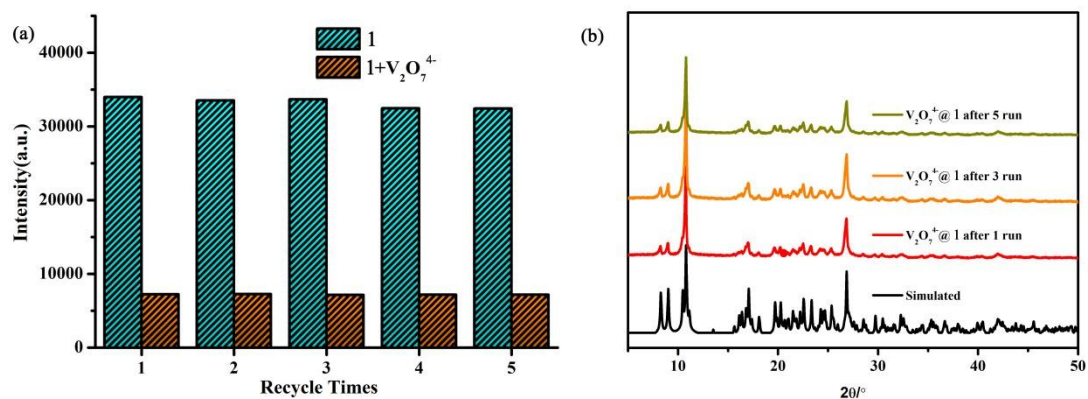

**Fig.S4** (a) Recyclability of complex **1** immerses in  $V_2O_7^{4-}$ ; (b) PXRD patterns of complex **1** after sensing five times.

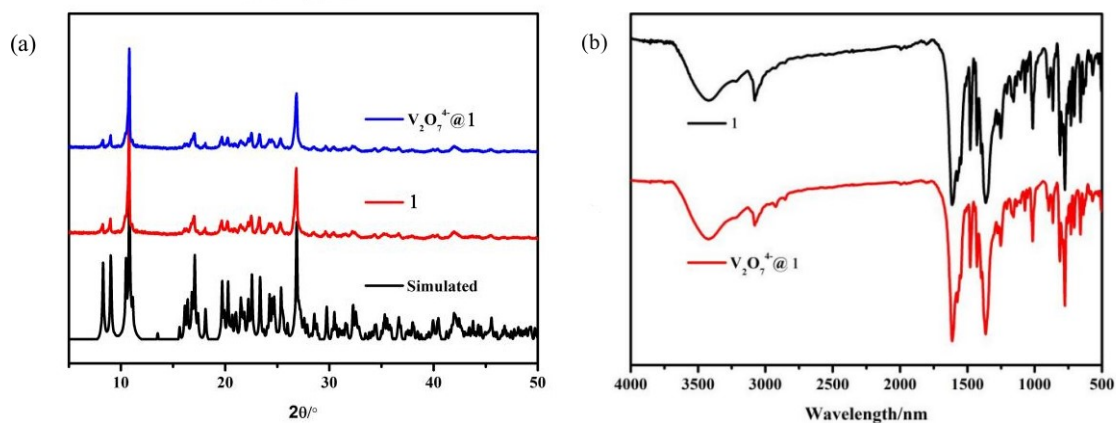

**Fig.S5** (a) The PXRD patterns of **1** and  $V_2O_7^{4-}@1$ ; (b) The IR spectra of **1**, **1** soaked in  $V_2O_7^{4-}$  aqueous solutions.

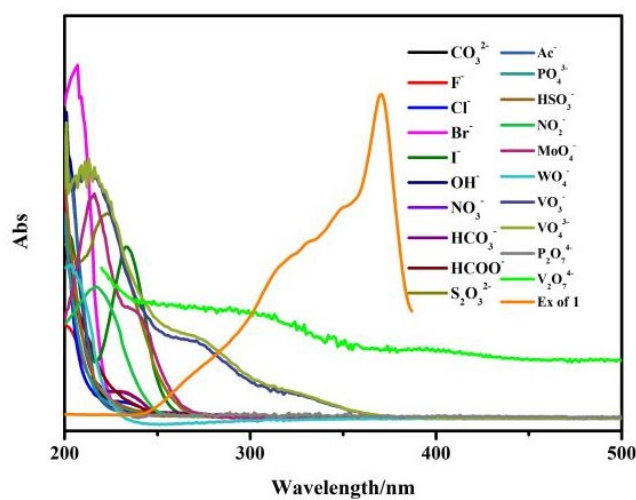

**Fig.S6** UV-vis absorption spectra of anions and the excitation one of **1**.

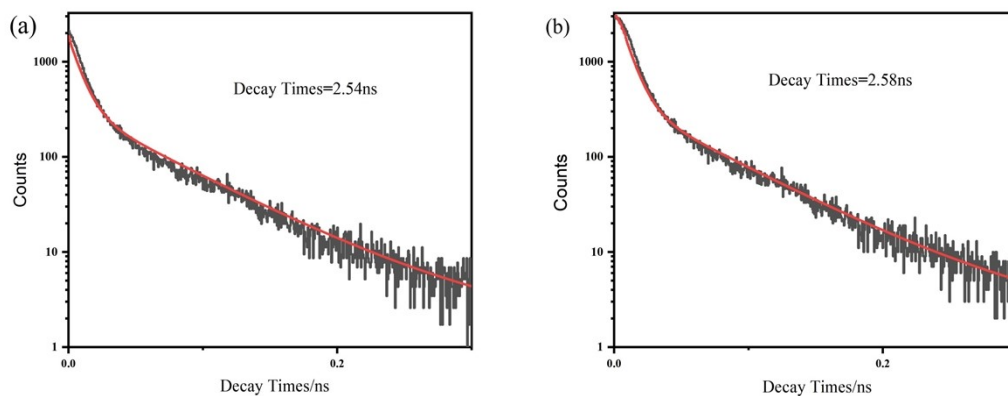

**Fig.S7** The fluorescence decay and fit curve for (a) complex 1; (b) V<sub>2</sub>O<sub>7</sub><sup>4-</sup>@1.

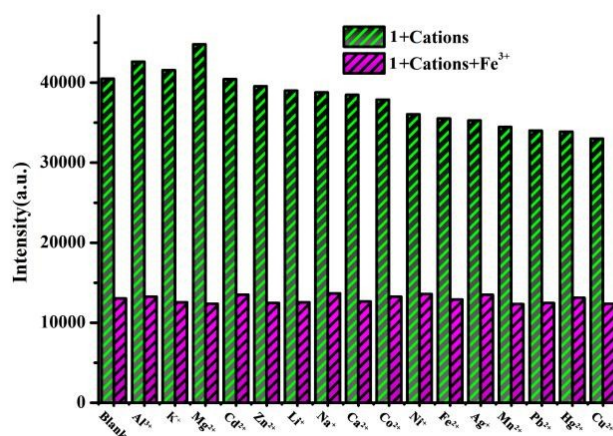

**Fig.S8** Comparison of fluorescence intensity of complex 1 in aqueous solution with different interfering cations and in aqueous solution with equal amount of Fe<sup>3+</sup>.

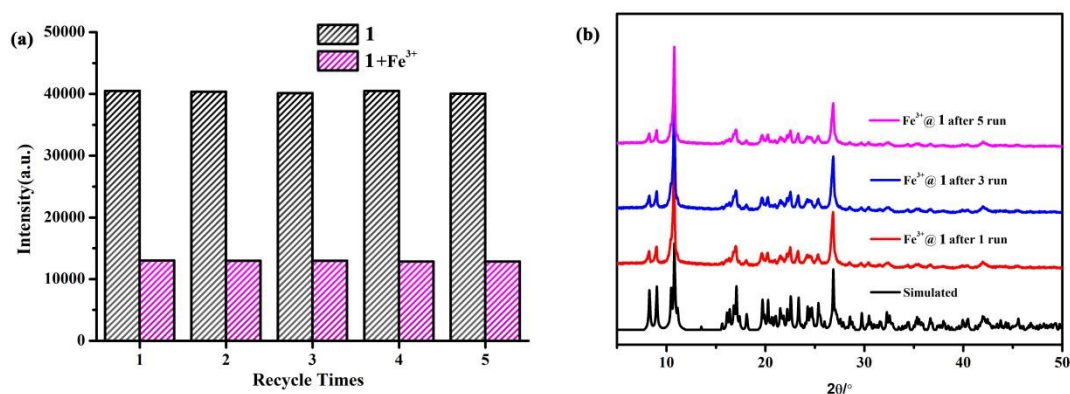

**Fig.S9** (a) Recyclability of complex 1 immerses in Fe<sup>3+</sup>; (b) PXRD patterns of complex 1 after sensing five times.

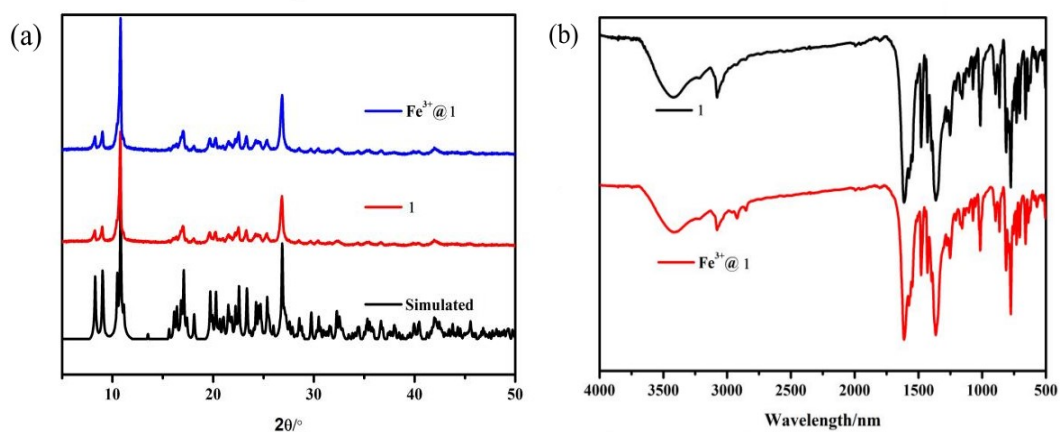

**Fig.S10** (a) The PXRD patterns of **1** and  $\text{Fe}^{3+}@\mathbf{1}$ ; (b) The IR spectra of **1**, **1** soaked in  $\text{Fe}^{3+}$  aqueous solutions.

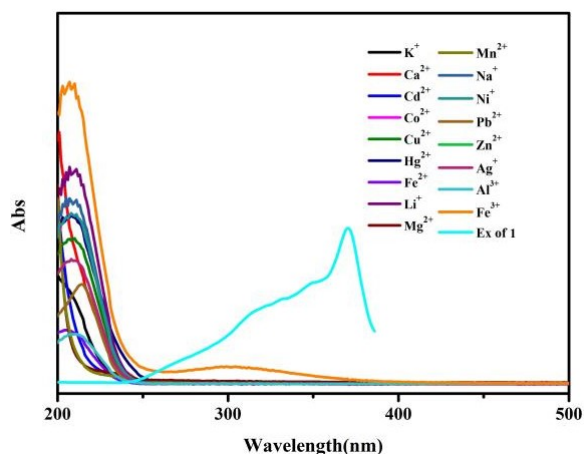

**Fig.S11** UV absorption spectra of some cations and the excitation one of **1**.

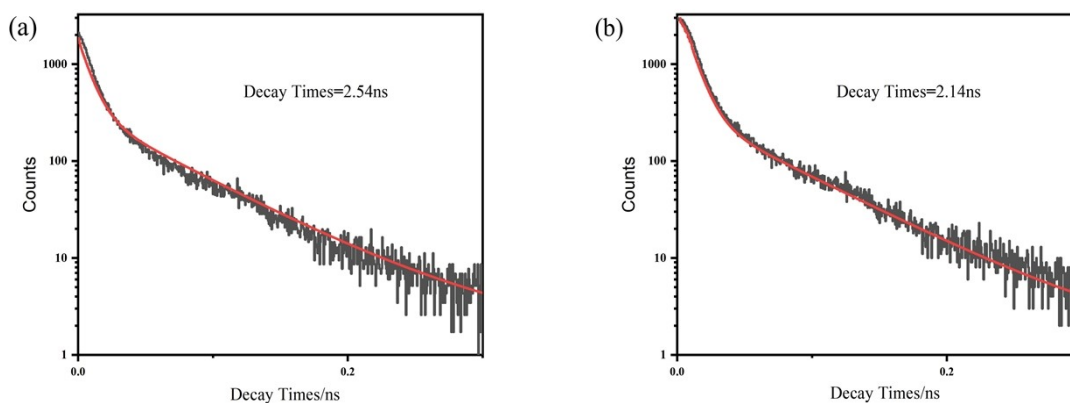

**Fig.S12** The fluorescence decay and fit curve for (a) complex **1**; (b)  $\text{Fe}^{3+}@\mathbf{1}$ .



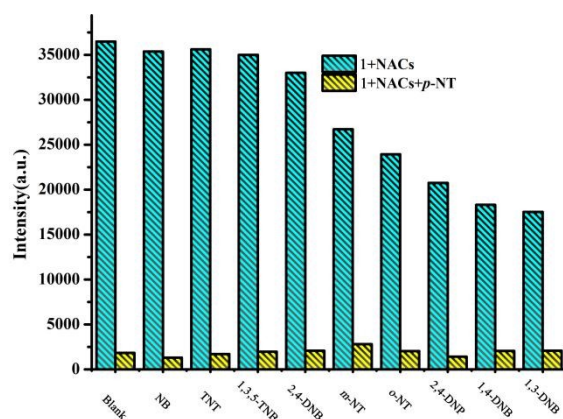

**Fig.S13** Comparison of fluorescence intensity of complex **1** in methanol solutions with different interference NACs and the same amount of *p*-NT methanol.

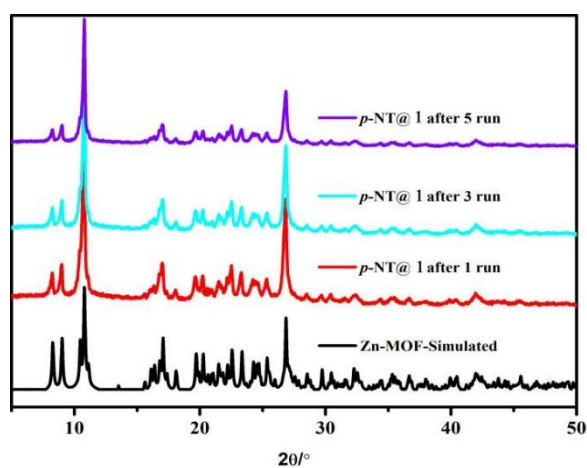

**Fig.S14** PXRD patterns of complex **1** after sensing five times.

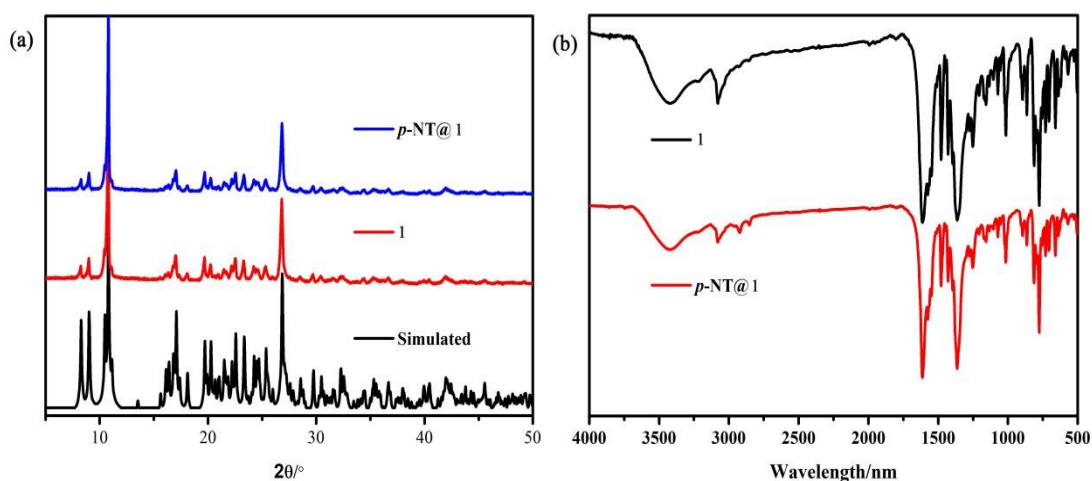

**Fig.S15** (a) PXRD of **1** and complex **1** in methanol solution of *p*-NT; (b) IR of *p*-NT@**1** and **1**.

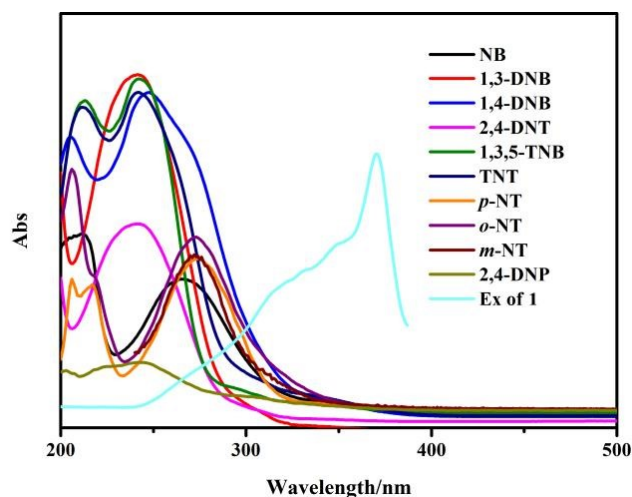

**Fig.S16** UV-vis absorption spectrum of NACs and the excitation spectrum of complex **1**.

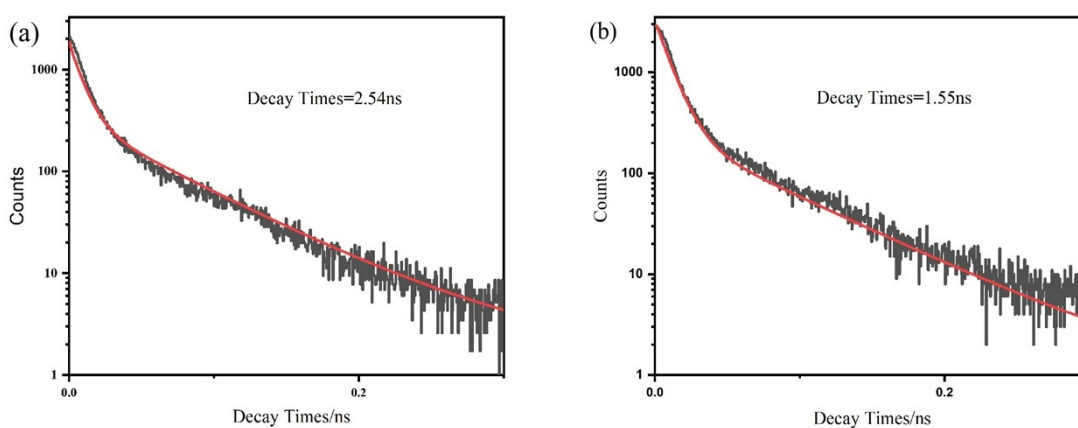

**Fig.S17** The fluorescence decay and fit curve for (a) complex **1**; (b) *p*-NT@**1**.

## References

- (1) T. R. Zheng, V. A. Blatov, Y. Q. Zhang, C. H. Yang, L. L. Qian, K. Li, B. L. Li, B. Wu, *Journal of Luminescence*, 2018, **199**, 126–132.
- (2) J. D. Ding, J. F. Chen, Q. Lin, H. Yao, Y. M. Zhang, T. B. Wei, *Polym. Chem.*, 2018, **9**, 5370.
- (3) F. Y. Zhong, C. Q. Li, Y. B. Xie, H. Xu, J. K. Gao, *Journal of Solid State Chemistry*, 2019, **278**, 120892.
- (4) L. L. Hou, Y. H. Song, F. X. Lang, Z. R. Wang, L. Wang, *Journal of Industrial and Engineering Chemistry*, 2020, **90**, 145–151.
- (5) Y. Wang, J. L. Wang, J. X. Ma, Y. Zhang, N. Xu, X. L. Wang, *Chem. Res. Chinese Universities*, 2022, **38**(4), 1105–1110.

- (6) Y. Q. Zhang, V. A. Blatov, T. R. Zheng, C. H. Yang, L. L. Qian, K. Li, B. L. Li, B. Wu, *Dalton Trans.*, 2018, **47**, 6189.
- (7) C. Zhang, G. J. Pan, Y. He, *Talanta*, 2022, **236**, 122872.
- (8) Z. W. Li, B. Tan, Z. F. Wu, X. Y. Huang, *Materials*, 2023, **16**, 577.
- (9) X. P. Wang, L. L. Han, Z. Wang, L. Y. Guo, D. Sun, *Journal of Molecular Structure*, 2016, **1107**, 1-6.
- (10) N. A. Ashashi, Z. u. Nisa, R. Singhaal, C. Sen, M. Ahmad, A. Frontera, and H. N. Sheikh, *ACS Omega*, 2022, **7**, 41370–41391.
- (11) Y. F. Tao, Y. S. Jiang, Y. T. Huang, J. N. Liu, P. Zhang, X. D. Chen, Y. Fan, L. Wang, J. N. Xu, *CrystEngComm*, 2021, **23**, 4038.
- (12) N. Tomer, A. Goel, P. Bhalla, P. Bhagat, R. Malhotra, *Journal of Photochemistry & Photobiology, A: Chemistry*, 2022, **427**, 113823.
- (13) K. Ahmada, A. Mohammada, S. M. Mobin, *Electrochimica Acta*, 2017, **252**, 549–557.
- (14) M. Z. K. Baig, P. K. Sahu, M. Sarkar, M. Chakravarty, *J. Org. Chem.*, 2017, **82**, 13359–13367.
- (15) S. S. Nagarkar, B. Joarder, A. K. Chaudhari, S. Mukherjee, S. K. Ghosh *Angew, Chem. Int. Ed. Engl.*, 2013, **52**, 2881-2885.
- (16) X. L. Zhang, Z. Y. Zhan, X. Y. Liang, C. Chen, X. L. Liu, Y. J. Jia, M. Hu, *Dalton. Trans*, 2018, **47**, 3272.
- (17) G. Yildirim, S.D. Senol, M. Dogruer, O. Ozturk, A. Senol, A.T. Tasci, C. Terzioglu, *Spectrochimica Acta Part A*, 2012, **85**, 271–282.
- (18) P. Majee, D. K. Singha, S. K. Mondal, P. Mahata, *ChemistrySelect*, 2018, **3**, 683–689.
- (19) X. Han, J. L. Tong, G. Y. Ding, C. Y. Sun, X. L. Wang, Z. M. Su, J. Sun, L. L. Wen, G. G. Shan, *New J. Chem.*, 2022, **46**, 1551.
